# Supplementary material
Source: MDPI journal article supplement (https://www.mdpi.com/2071-1050/14/18/11458)
Supplement: s1 [file s1 › sustainability-1814440-supplementary.pdf]

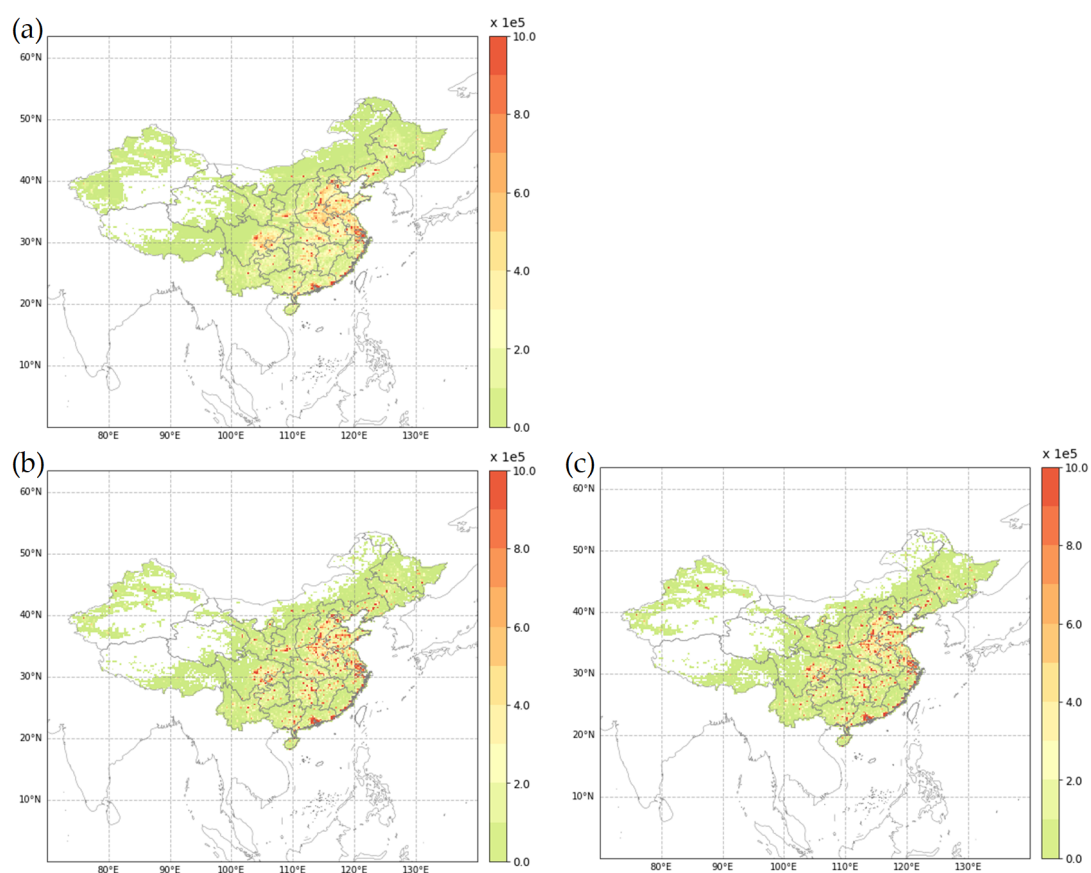

**Figure S1.** Spatial distribution of population at  $0.25^\circ \times 0.25^\circ$  grid cells. (a) is LansScan at present. (b) is Tsinghua population at 1.5 C° warming scenarios. (c) is Tsinghua population at 2.0 C° warming scenarios. Only grid cells with population over 500 are plotted.

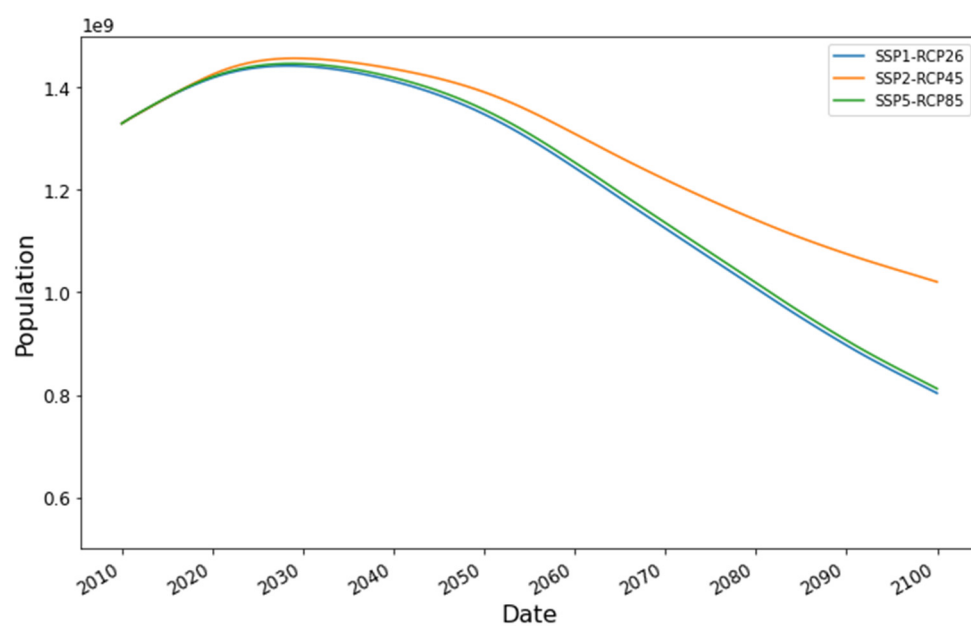

**Figure S2.** Dynamics of projected total population in China.

**Table S1.** Overview of twenty CMIP6 models used in this study.

| <b>Model</b>     | <b>Native Resolution<br/>(lat × lon)</b> | <b>Institution</b>                                                                                                                              |
|------------------|------------------------------------------|-------------------------------------------------------------------------------------------------------------------------------------------------|
| ACCESS-CM2       | 144 × 192                                | Commonwealth Scientific and Industrial Research Organisation,<br>Research Council Centre of Excellence for Climate System Science,<br>Australia |
| ACCESS-ESM1-5    | 145 × 192                                | Commonwealth Scientific and Industrial Research Organisation,<br>Australia                                                                      |
| CanESM5          | 64 × 128                                 | Canadian Centre for Climate Modelling and Analysis, Canada                                                                                      |
| CMCC-ESM2        | 192 × 288                                | Fondazione Centro Euro-Mediterraneo sui Cambiamenti Climatici,<br>Italy                                                                         |
| EC-Earth3        | 256 × 512                                | EC-Earth-Consortium, Europe                                                                                                                     |
| EC-Earth3-Veg    | 256 × 512                                | EC-Earth-Consortium, Europe                                                                                                                     |
| EC-Earth3-Veg-LR | 160 × 320                                | EC-Earth-Consortium, Europe                                                                                                                     |
| FGOALS-g3        | 80 × 180                                 | Chinese Academy of Sciences, China                                                                                                              |
| GFDL-ESM4        | 180 × 288                                | National Oceanic and Atmospheric Administration, Geophysical Fluid<br>Dynamics Laboratory, USA                                                  |
| INM-CM4-8        | 120 × 180                                | Institute for Numerical Mathematics,<br>Russian Academy of Science, Russia                                                                      |
| INM-CM5-0        | 120 × 180                                | Institute for Numerical Mathematics,<br>Russian Academy of Science, Russia                                                                      |
| IPSL-CM6A-LR     | 143 × 144                                | Institut Pierre Simon Laplace, France                                                                                                           |
| KACE-1-0-G       | 144 × 192                                | National Institute of Meteorological Sciences/Korea Meteorological<br>Administration, Republic of Korea                                         |
| MIROC6           | 128 × 256                                | Model for Interdisciplinary Research on Climate (MIROC), Japan                                                                                  |
| MPI-ESM1-2-HR    | 192 × 384                                | Deutsches Klimarechenzentrum , Germany                                                                                                          |
| MPI-ESM1-2-LR    | 96 × 192                                 | Max Planck Institute for Meteorology, Germany                                                                                                   |
| MRI-ESM2-0       | 160 × 320                                | Meteorological Research Institute, Japan                                                                                                        |
| NorESM2-LM       | 96 × 144                                 | Norwegian Earth System Model version 2 (NorESM2) Climate<br>modeling Consortium (NCC), Norway                                                   |
| NorESM2-MM       | 192 × 288                                | NCC, Norway                                                                                                                                     |
| TaiESM1          | 192 × 288                                | Research Center for Environmental Changes, Taiwan, China                                                                                        |
